# Supplementary material for: Macrophage-targeted chitosan anchored PLGA nanoparticles bearing doxorubicin and amphotericin B against visceral leishmaniasis
Source: Royal Society of Chemistry journal article supplement (doi:10.1039/c6ra06007b), 2016-01-01

## Macrophage-targeted chitosan anchored PLGA nanoparticles bearing Doxorubicin and Amphotericin B against visceral leishmaniasis

**Supplementary figure 1.** FTIR Spectra of (A) AmB, (B) Dox, (C) Formulation, (D) Physical mixture, (E) PLGA.

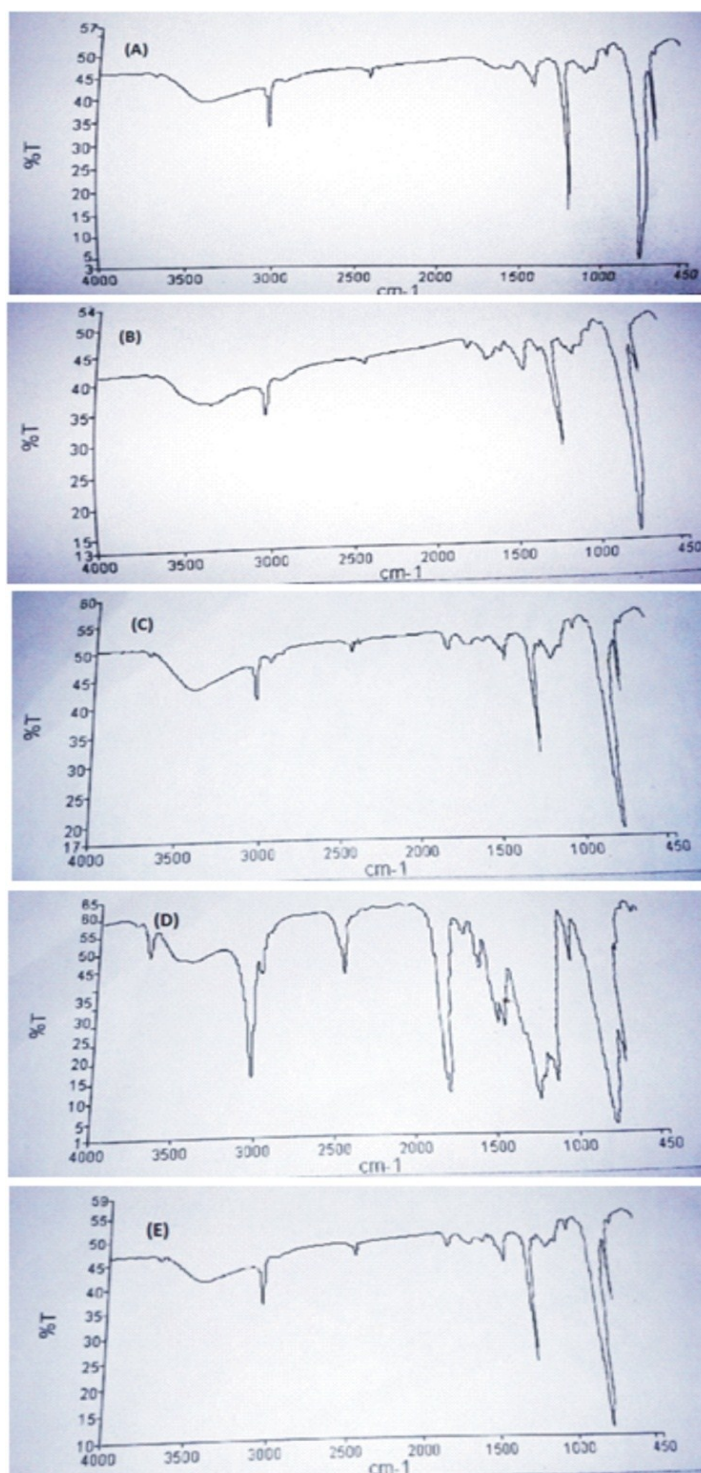

Supplement: c6ra06007b1.pdf [file c6ra06007b1.pdf]
